# Supplementary material
Source: PubMed Central journal article supplement (PMC3445707)
Supplement: NIHMS396837-supplement-1.pdf [file NIHMS396837-supplement-1.pdf]

**Supplemental Table 1. Distinctive features of three tumors derived from mutual synergy of over-expression of AR and activation of Kras and Akt signaling pathways.**

| <b>Oncogenic synergy</b>         | <b>Number of CK8+*</b> | <b>Number of CK5+*</b> | <b>Number of P63*</b> | <b>EZH2</b> | <b>H3K27m3</b> | <b>Secondary transplantation potential</b> |
|----------------------------------|------------------------|------------------------|-----------------------|-------------|----------------|--------------------------------------------|
| Kras(G12D)+mAkt                  | +++                    | +                      | +                     | -           | -              | No                                         |
| mAkt+AR                          | +<br>(weak expression) | -                      | -                     | -           | +              | No                                         |
| Kras(G12D)+AR<br>primary tumor   | +                      | +++                    | +++                   | +++         | +++            | Yes                                        |
| Kras(G12D)+AR<br>secondary tumor | +                      | +++                    | +++                   | +++         | +++            |                                            |

\*CK8+ represents luminal cells; CK5+ represents basal cells; p63+ represents basal stem cells.
