# Supplementary material
Source: PubMed Central journal article supplement (PMC3445707)

# Supplemental Figure S1

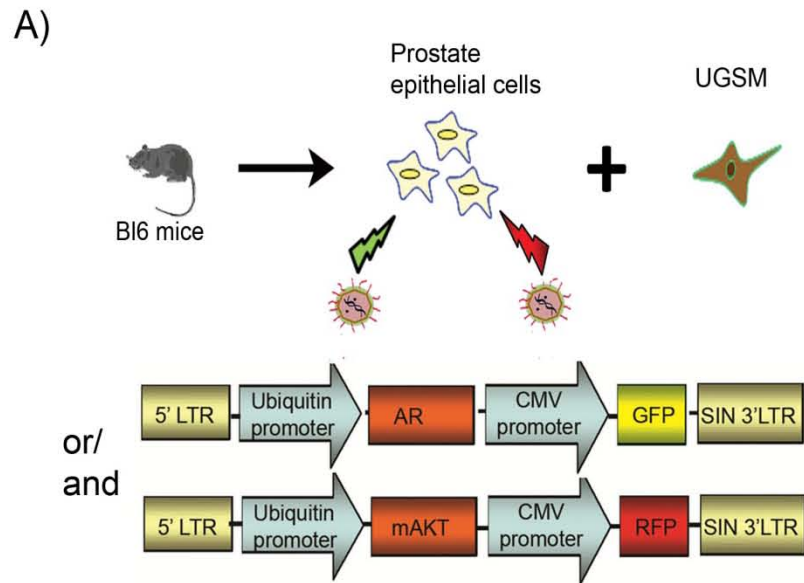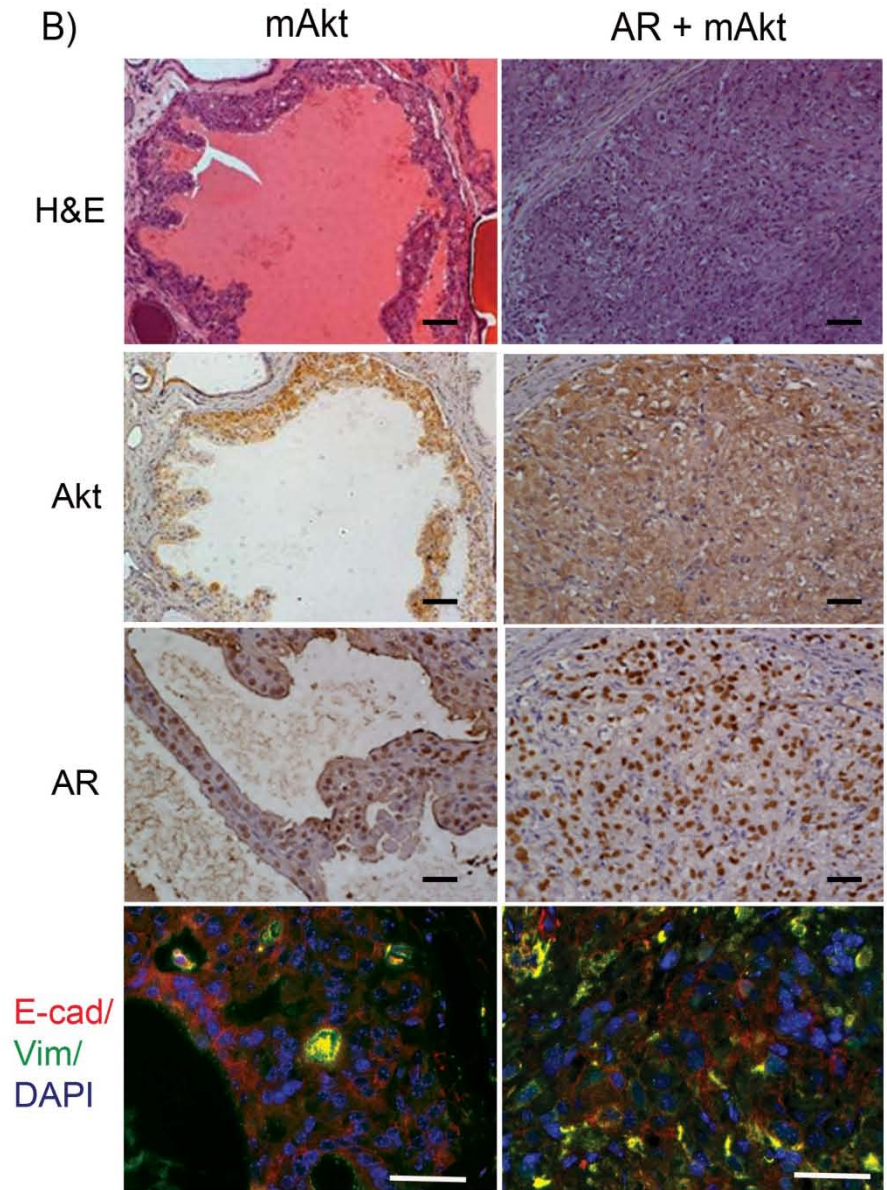

Supplement: NIHMS396837-supplement-2.pdf [file NIHMS396837-supplement-2.pdf]

# Supplemental Figure S2

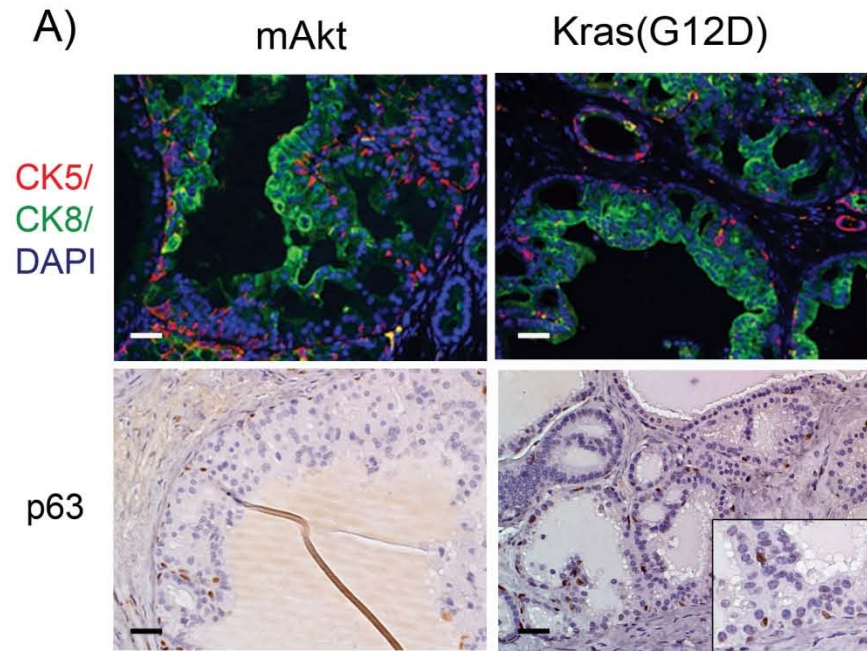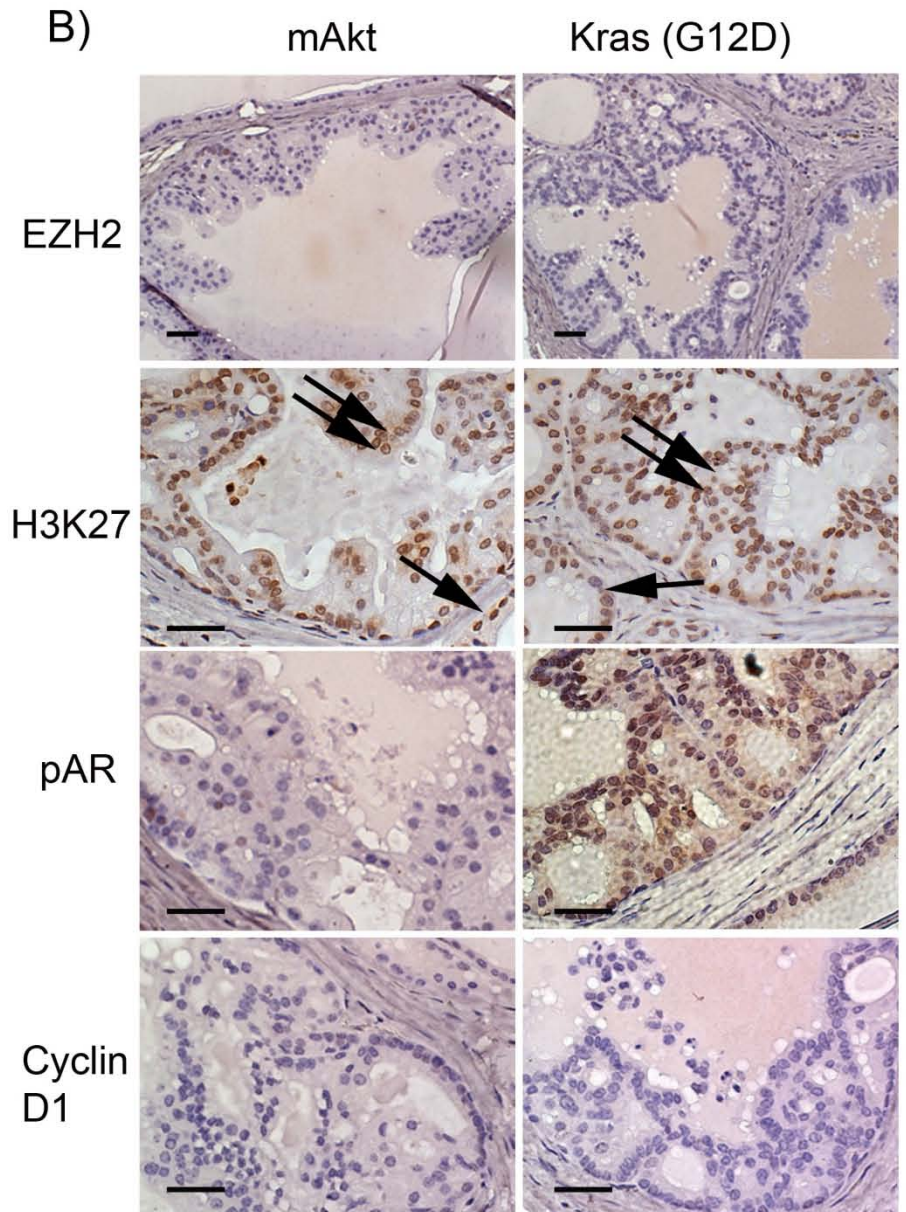

Supplement: NIHMS396837-supplement-3.pdf [file NIHMS396837-supplement-3.pdf]

# Supplemental Figure S3

CK5

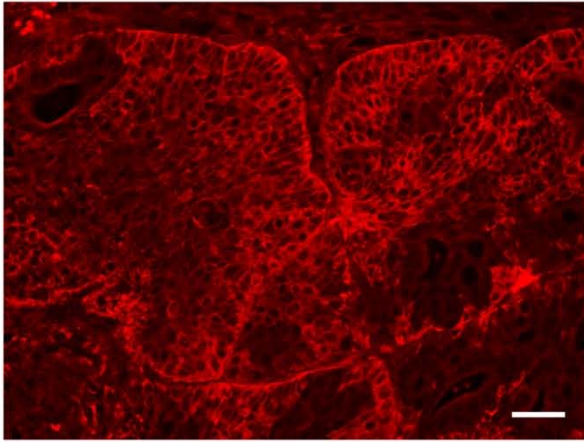

P63

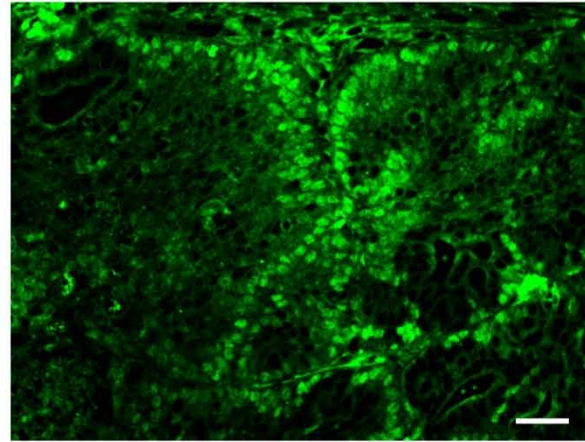

CK5/P63 Merged

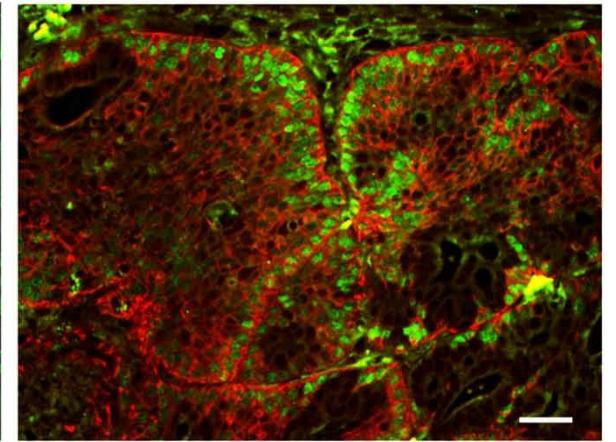

Supplement: NIHMS396837-supplement-4.pdf [file NIHMS396837-supplement-4.pdf]

# Supplemental Figure S4

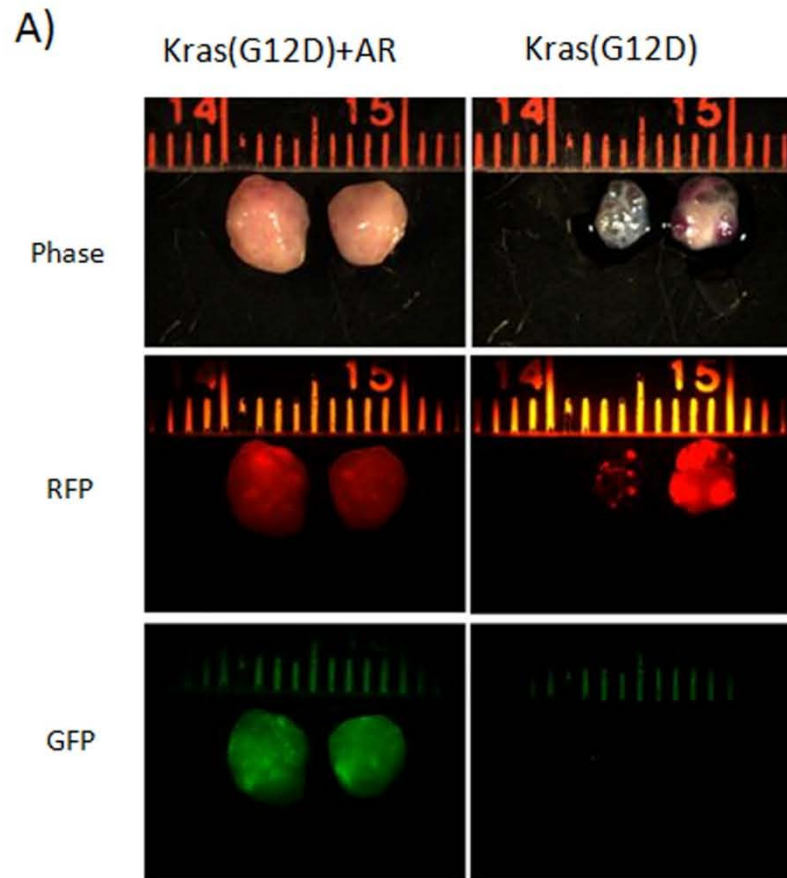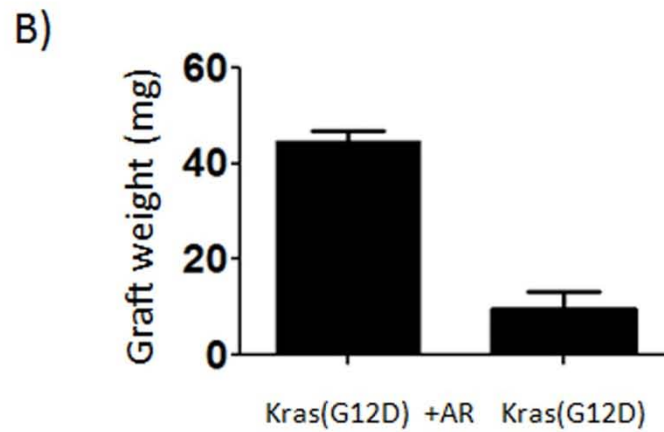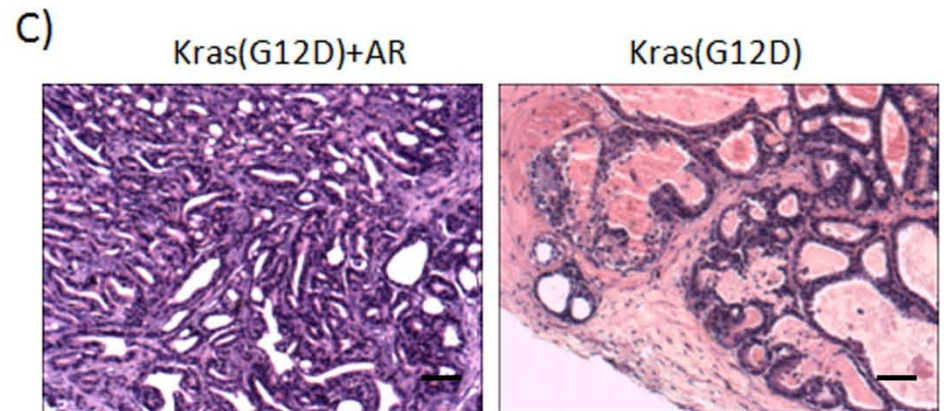

Supplement: NIHMS396837-supplement-5.pdf [file NIHMS396837-supplement-5.pdf]

# Supplemental Figure S5

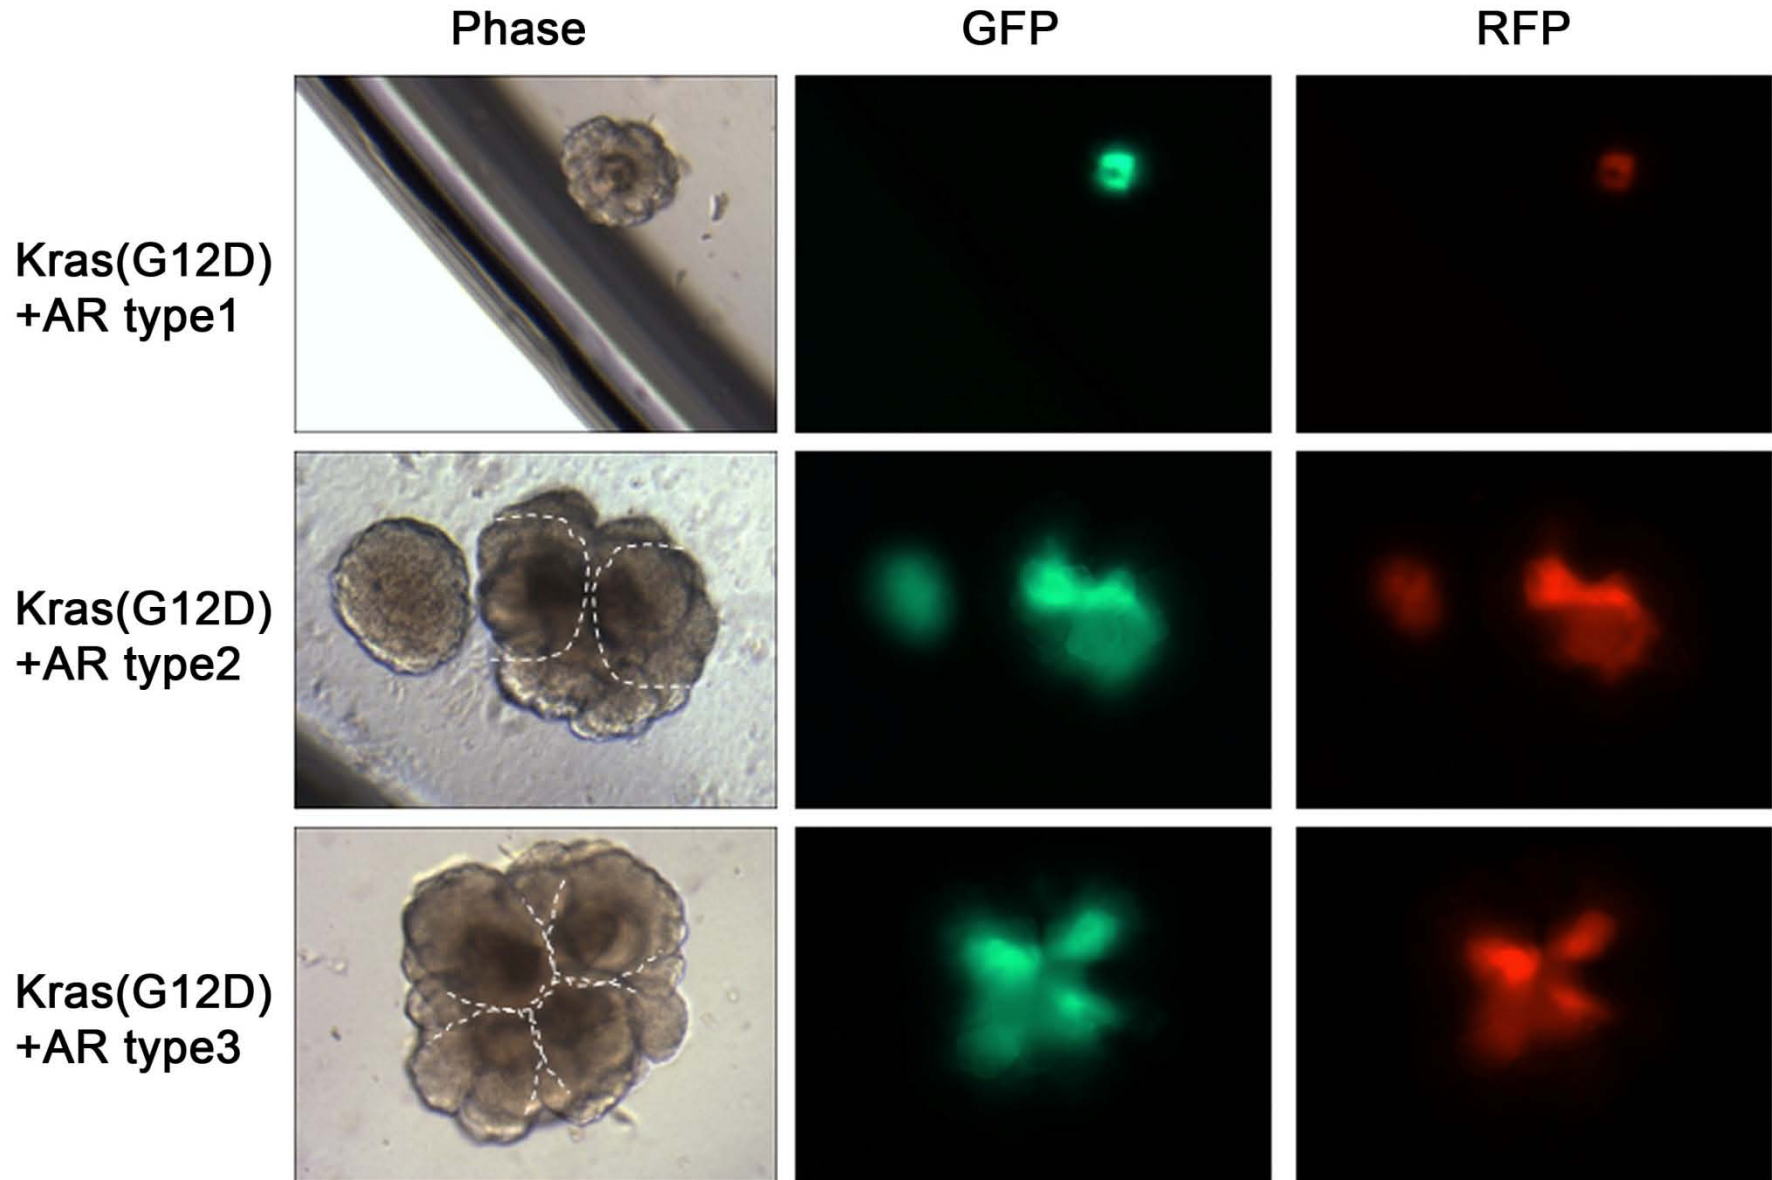

Supplement: NIHMS396837-supplement-6.pdf [file NIHMS396837-supplement-6.pdf]

# Supplemental Figure S6

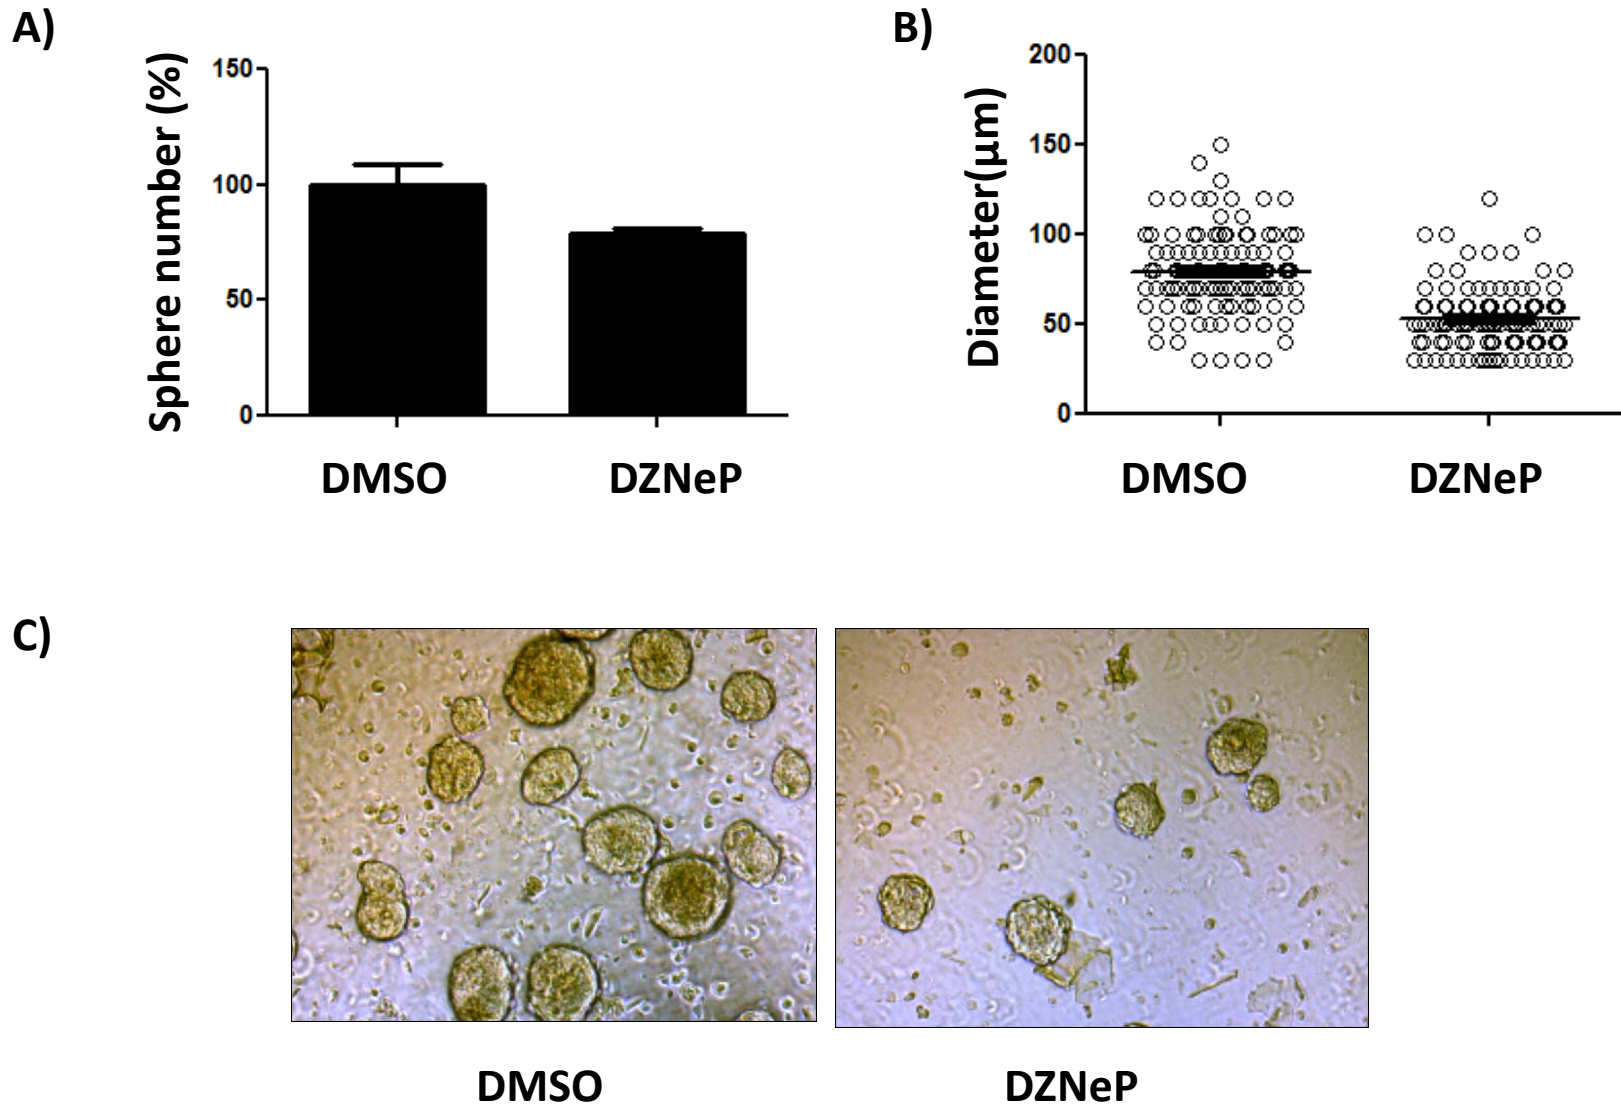

Supplement: NIHMS396837-supplement-7.pdf [file NIHMS396837-supplement-7.pdf]
